# Supplementary material for: The Effects of Hyperacute Serum on the Elements of the Human Subchondral Bone Marrow Niche
Source: PubMed Central journal article supplement (PMC5926480; doi:10.1155/2018/4854619), 2018-04-16
Supplement: 4854619.f1.pdf [file 4854619.f1.pdf]

## Supplementary data

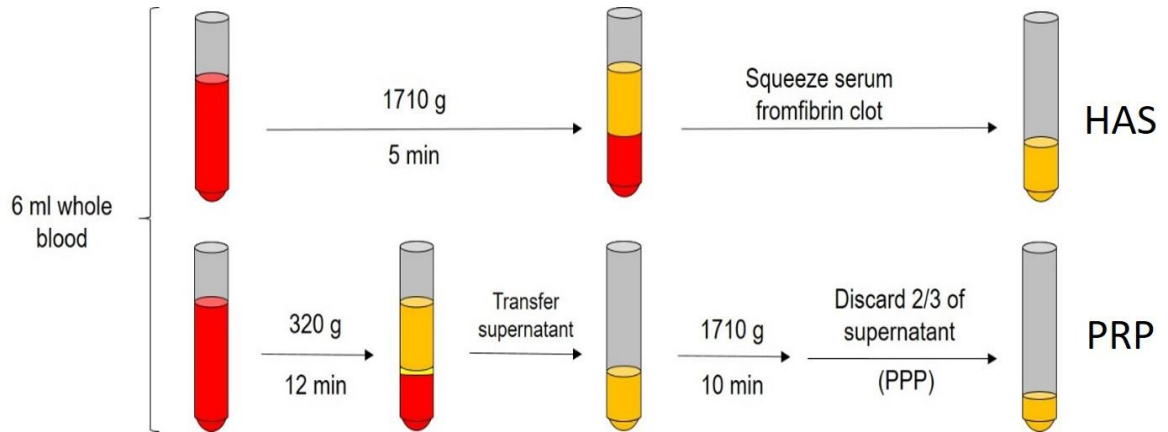

*Supplementary figure 1. Isolation method of HAS and PRP.*

|     |                                 | <b>GENE NAME</b>                                 | <b>ASSAY ID</b> | <b>GENE SYMBOL</b> | <b>ENTREZ GENE ID</b> |
|-----|---------------------------------|--------------------------------------------------|-----------------|--------------------|-----------------------|
| 1.  | Mesenchymal stem cell markers   | activated leukocyte cell adhesion molecule       | Hs00977641_m1   | ALCAM              | 214                   |
| 2.  |                                 | integrin subunit beta 1                          | Hs01127536_m1   | ITGB1              | 3688                  |
| 3.  |                                 | alanyl aminopeptidase                            | Hs00174265_m1   | ANPEP              | 290                   |
| 4.  |                                 | endoglin                                         | Hs00923996_m1   | ENG                | 2022                  |
| 5.  | Osteoblast markers              | collagen type I.                                 | Hs00164004_m1   | COL1A1             | 1277                  |
| 6.  |                                 | runt related transcription factor 2              | Hs01047973_m1   | RUNX2              | 860                   |
| 7.  |                                 | alkaline phosphatase, liver/bone/kidney          | Hs01029144_m1   | ALPL               | 249                   |
| 9.  | Adipocyte markers               | peroxisome proliferator activated receptor gamma | Hs00234592_m1   | PPARG              | 5468                  |
| 10. |                                 | fatty acid binding protein 4                     | Hs01086177_m1   | FABP4              | 2167                  |
| 11. |                                 | adiponectin                                      | Hs00605917_m1   | ADIPOQ             | 9370                  |
| 12. | Hematopoietic stem cell markers | CD14                                             | Hs02621496_s1   | CD14               | 929                   |
| 13. |                                 | CD34                                             | Hs02576480_m1   | CD34               | 947                   |
| 14. |                                 | protein tyrosine phosphatase, receptor type C    | Hs04189704_m1   |                    | 5788                  |
| 15. | Osteocyte markers               | podoplanin                                       | Hs00366766_m1   | PDPN               | 10630                 |
| 16. |                                 | dentin matrix acidic phosphoprotein 1            | Hs01009390_m1   | DMP1               | 1758                  |
| 17. |                                 | matrix extracellular phosphoglycoprotein         | Hs00220237_m1   | MEPE               | 56955                 |
| 18. | Apoptotic marker                | BCL2 associated X                                | Hs00180269_m1   | BAX                | 581                   |
| 19. | Antiapoptotic marker            | BCL2                                             | Hs00608023_m1   | BCL2               | 596                   |
| 20. | Houskeeping control gene        | actin beta                                       | Hs01060665_g1   | ACTB               | 60                    |

*Supplementary figure 2. Real-time qPCR primer collection.*

|                                           |                                                                               |
|-------------------------------------------|-------------------------------------------------------------------------------|
| <b>Positive Marker Cocktail</b>           | CD105 PerCP-Cy5.5/CD73 APC/CD90 FITC                                          |
| <b>Additional Positive Drop-In Marker</b> | CD44 PE                                                                       |
| <b>Negative Marker Cocktail</b>           | CD45/CD34/CD11b/CD19/HLA-DR PE                                                |
| <b>Isotype Controls</b>                   | mlgG1, κ PerCP-Cy5.5/ mlgG1, κ APC /<br>mlgG1, κ FITC (for positive cocktail) |
|                                           | mlgG1, κ/mlgG2a, κ PE (for negative cocktail)                                 |
|                                           | mlgG2b,κ PE (for CD44 drop in)                                                |

*Supplementary figure 3. Flow cytometry analysis antibody cocktails.*

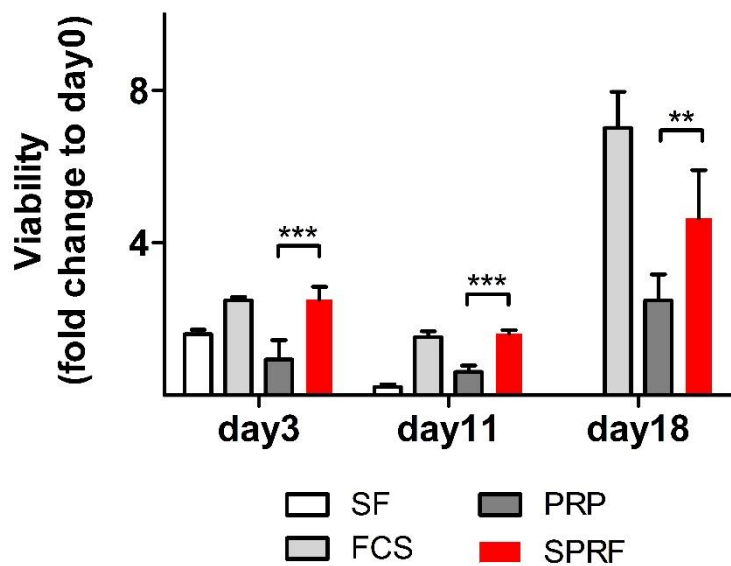

*Supplementary figure 4. Time-course effect of serum supplements on osteoblasts.*

Subconfluent osteoblasts (LONZA, Walkersville, USA) were cultured in high glucose DMEM with pyruvate (Gibco, Paisley, Scotland) and with antibiotics (penicillin 200 U/mL; streptomycin 0.2 mg/mL, and amphotericin B 2.5 µg/mL) (Sigma-Aldrich, St. Louis, USA), and l-ascorbic acid (50 µg/mL; Sigma-Aldrich, St. Louis, USA). in the absence of supplement (□), 10 (v/v)% of FCS (▤), 10 (v/v)% FCS + 1 ng/mL bFGF (▥), 10 (v/v)% PRP (▦) or 10 (v/v)% SPRF (■). XTT viability assay was performed on the third, 11<sup>th</sup> and 18<sup>th</sup> day. Results are presented as means of triplicate samples in three experiments ± SD.  $p < 0.0001$  \*\*\*.

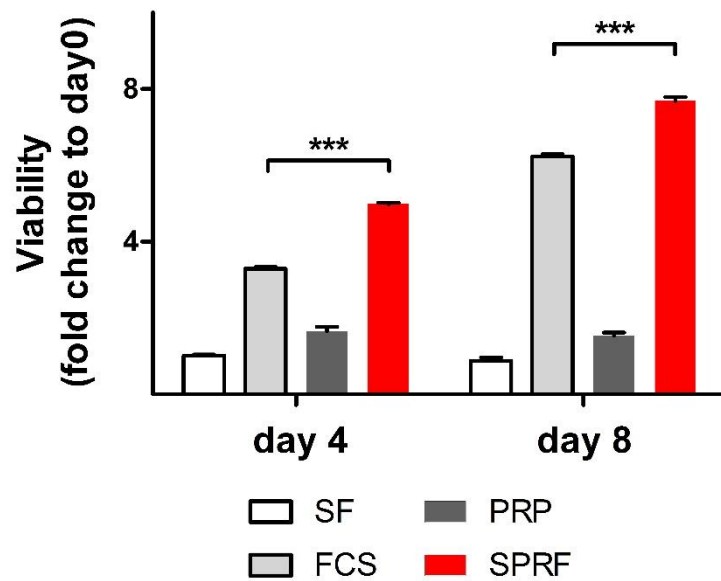

*Supplementary figure 5. Time-course effect of serum supplements on osteoarthritic chondrocytes.* Cells were cultured in DMEM/F12 (Gibco, Paisley, Scotland) with antibiotics (penicillin 200 U/mL; streptomycin 0.2 mg/mL, and amphotericin B 2.5 µg/mL) (Sigma-Aldrich, St. Louis, USA), and l-ascorbic acid (50 µg/mL; Sigma-Aldrich, St. Louis, USA), in the absence of supplement (□), 10 (v/v)% of FCS (▤), 10 (v/v)% FCS + 1 ng/mL bFGF (▥), 10 (v/v)% PRP (▦) or 10 (v/v)% SPRF (■). XTT viability assay was performed on the 4<sup>th</sup> and 8<sup>th</sup> day. Results are presented as means of triplicate samples in three experiments ± SEM.  $p < 0,0001$  \*\*\*.
